# Supplementary material for: Facile, fine post-tuning of the longitudinal absorption wavelengths of pre-synthesized gold nanorods by introducing sulfide additives
Source: Royal Society of Chemistry journal article supplement (doi:10.1039/c5ra05979h), 2015-01-01
Supplement: c5ra05979h1.pdf [file c5ra05979h1.pdf]

## SUPPORTING INFORMATION

for

### Facile, fine post-tuning of the longitudinal absorption wavelengths of pre-synthesized gold nanorods by introducing sulfide additives

Youngjin Park and Jaeyun Kim\*

School of Chemical Engineering, Sungkyunkwan University, Suwon 440-746, Republic of Korea

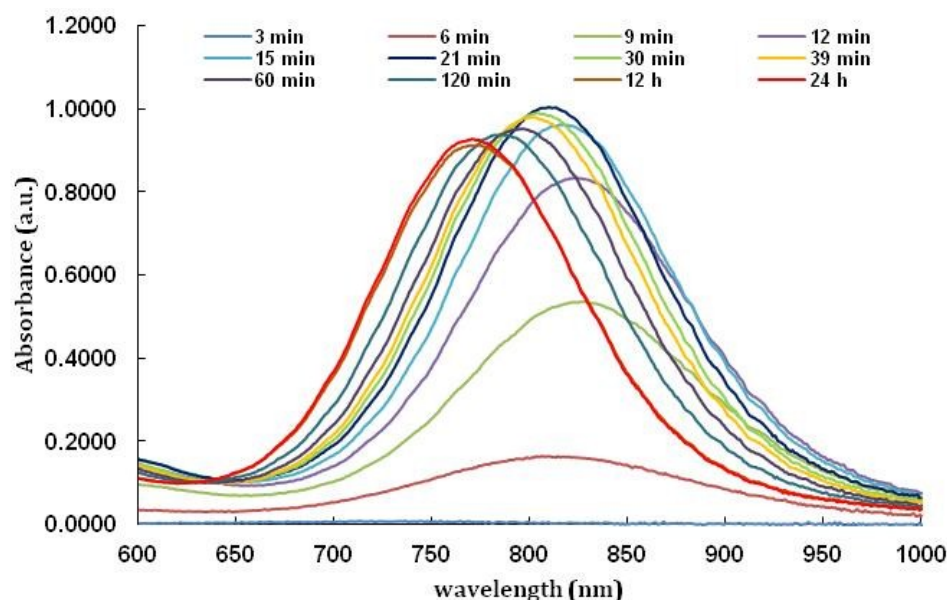

**Fig. S1.** Change in longitudinal absorption peaks of GNRs over time after addition of the seed solution into the growth solution.

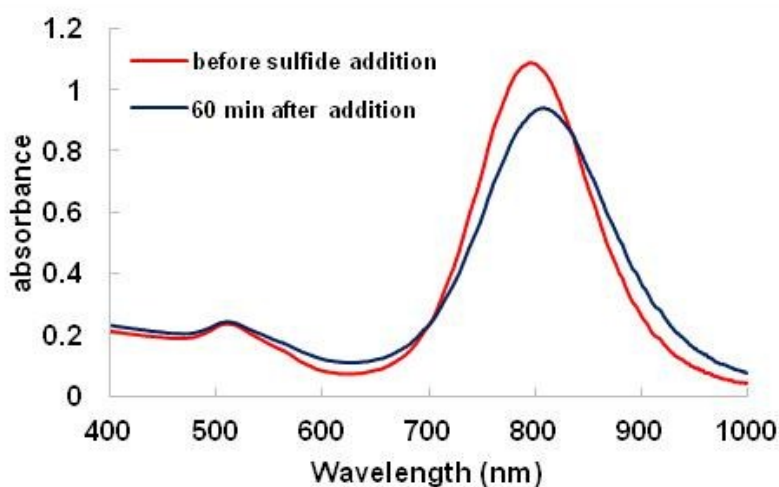

**Fig. S2.** UV-Vis absorption spectrum of pre-prepared GNRs with 797 nm of LSPR wavelength before (red line) and after addition of 25  $\mu$ l of sulfide solution (blue line).
